# Supplementary material for: Optimizing the effect of gestational hypertension on sex-specific neonatal anthropometric characteristics and Apgar score
Source: Research Square preprint supplement (doi:10.21203/rs.3.rs-6612239/v1), 2025-09-08
Supplement: Supplementary file 1 [file 25ab6221ce0e2b254aab3c68.xlsx]

## Sheet: Sheet1
stateofhealthcoded	stateofhealth	ges Agecla	GEST. AGE(weeks)	MODE OF DEL.	agecla	AGE (years)	HEIGHT (m)	WEIGHT(kg)	BMI(kg/m2)	%BODY FAT	WAIST CIRCUM(cm)	HIP CIRCUM(cm)	WHRcla	WHR	HEIGHT OF FUNDUS(cm)	PARITY	SBP	DBP	PULSE PRESSURE	SEX OF BABY	Weightcoded	WEIGHT(Kg)	lengthcoded	LENGTH (cm)	Hccoded	HC (cm)	APGAR SCORE	apgar score	residentcoded	RESIDENCE	Educationcoded	EDUCATIONAL STATUS	occupationcoded	OCCUPATION	alcoholic intake
1	overweighthypertension	preterm	31	C/S	early	23	1.65	70	25.7	30.73	90	93	high	0.97	30	0	190	100	90	F	low	1.6	abnormal	42	microcephaly	32	4	abnormal	3	Rural	3	primary	3	Farming	no
1	overweighthypertension	fulltime	40	C/S	early	23	1.7	82	28.4	33.97	89	94	high	0.95	45	0	180	130	50	M	normal	2.5	normal	49	normal	36	7	normal	3	Rural	2	Secondary	3	Farming	no
1	overweighthypertension	earlyterm	38	SVD	active	33	1.72	87	29.4	37.47	93	95	high	0.98	37	1	160	80	80	M	normal	3.5	normal	50	normal	36	9	normal	1	Urban	1	Tertiary	1	Civil Servant	no
1	overweighthypertension	fulltime	40	C/S	early	20	1.53	60	25.6	29.69	91	97	high	0.94	35	0	150	85	65	M	low	2.2	normal	48	normal	36	3	abnormal	1	Urban	3	Primary	2	Trading	no
1	overweighthypertension	fullttime	40	SVD	early	25	1.69	83	29.1	35.37	90	94	high	0.96	36	0	153	91	62	M	normal	3.5	normal	50	normal	36	2	abnormal	3	Rural	3	Primary	4	Labour	yes
1	overweighthypertension	earlyterm	38	C/S	active	35	1.59	73	28.9	37.33	94	95	high	0.99	40	1	140	100	40	F	normal	3.6	normal	51	normal	36	9	normal	1	Urban	1	Tertiary	1	Civil Servant	no
1	overweighthypertension	fulltime	40	C/S	late	38	1.63	67	25.2	33.58	95	99	high	0.96	40	5	180	100	80	F	normal	2.8	normal	47	microcephaly	32	9	normal	3	Rural	3	Primary	3	Trading	no
1	overweighthypertension	fulltime	40	SVD	early	23	1.69	73	25.6	30.61	97	99	high	0.98	36	0	150	90	40	M	normal	3	normal	49	normal	34	8	normal	1	Urban	2	Secondary	5	Student	no
1	overweighthypertension	fulltime	40	SVD	active	35	1.78	90	28.4	37.09	96	100	high	0.96	38	7	220	120	100	F	normal	2.7	normal	48	normal	34	9	normal	2	Semi-Urban	1	Tertiary	1	Civil Servant	no
1	overweighthypertension	fulltime	38	SVD	active	35	1.76	80	25.7	33.49	87	91	high	0.96	37	1	90	60	30	F	normal	3.2	normal	49	normal	35	9	normal	1	Urban	1	Tertiary	1	Civil servant	yes
1	overweighthypertension	fulltime	38	SVD	late	36	1.63	78	29.4	38.16	88	90	high	0.98	38	0	90	60	30	M	normal	3.6	normal	53	normal	33	7	normal	1	Urban	1	Tertiary	1	Civil servant	no
1	overweighthypertension	lateterm	41	C/S	early	28	1.63	68	25.6	1.76	98	99	high	0.99	38	0	130	80	50	F	normal	3	normal	50	normal	40	4	abnormal	3	Rural	2	Secondary	2	Trading	no
1	overweighthypertension	fullterm	40	C/S	early	25	1.74	89	29.4	35.63	90	95	high	0.95	37	1	110	70	40	M	normal	3.5	normal	47	normal	34	8	normal	1	Urban	2	Secondary	5	Student	no
1	overweighthypertension	fullterm	40	SVD	early	26	1.58	68	27.2	33.22	95	99	high	0.96	36	0	110	70	40	F	normal	3.1	abnormal	45	microcephaly	31	9	normal	1	Urban	1	Tertiary	1	Civil servant	yes
1	overweighthypertension	earlyterm	38	SVD	early	26	1.62	73	27.8	33.94	89	97	high	0.92	38	0	100	60	40	M	normal	3.3	normal	49	normal	37	7	normal	1	Urban	2	Secondary	2	Trading	no
1	overweighthypertension	earlyterm	38	C/S	active	32	1.6	72	26.1	33.28	87	90	high	0.97	38	3	100	60	40	M	normal	3.5	normal	49	normal	35	8	normal	1	Urban	1	Tertiary	1	Civil servant	no
1	overweighthypertension	fullterm	39	C/S	active	31	1.63	74	27.9	35.21	88	92	high	0.96	39	2	100	70	30	F	normal	3.3	normal	47	normal	36	8	normal	1	Urban	2	Secondary	2	Trading	no
1	overweighthypertension	fullterm	39	SVD	active	34	1.55	63	26.2	33.86	89	94	high	0.95	38	2	90	60	30	F	normal	3.5	normal	51	normal	36	9	normal	1	Urban	1	Tertiary	2	Trading	no
1	overweighthypertension	earlyterm	38	C/S	late	39	1.6	69	27	35.97	85	90	high	0.94	38	0	110	80	30	F	normal	3.1	abnormal	46	normal	36	9	normal	1	Urban	1	Tertiary	3	Farming	no
1	overweighthypertension	postterm	42	C/S	early	26	1.67	79	28.3	34.54	86	96	high	0.9	40	1	110	70	40	M	normal	3.1	normal	49	normal	36	9	normal	1	Urban	1	Tertiary	1	Civil servant	no
1	overweighthypertension	fullterm	39	SVD	active	32	1.66	72	26.1	33.28	90	95	high	0.95	36	1	90	50	40	M	normal	2.7	abnormal	45	normal	34	8	normal	1	Urban	1	Tertiary	2	Trading	no
1	overweighthypertension	fullterm	39	SVD	active	35	1.58	65	26	33.85	88	92	high	0.96	35	3	90	60	30	F	normal	3.3	normal	47	normal	33	9	normal	1	Urban	1	Tertiary	2	Trading	no
1	overweighthypertension	fullterm	39	SVD	early	27	1.6	72	28.1	34.53	85	90	high	0.94	38	2	120	80	40	M	normal	2.9	normal	48	normal	34	9	normal	1	Urban	1	Tertiary	3	Farming	no
1	overweighthypertension	earlyterm	38	C/S	late	38	1.6	72	28.1	35.45	87	94	high	0.93	39	3	130	80	50	M	normal	3.3	normal	48	normal	34	3	abnormal	1	Urban	1	Tertiary	3	Farming	no
2	overweightnonhypertension	earlyterm	38	SVD	late	35	1.69	77	26.96	35.05	85	87	high	0.98	34	0	90	60	30	M	normal	2.9	normal	47	microcephaly	31	9	normal	1	Urban	1	Tertiary	3	Farming	no
2	overweightnonhypertension	fullterm	39	SVD	early	21	1.8	86	26.5	31.23	84	88	high	0.95	37	0	110	60	50	F	normal	2.9	abnormal	46	normal	33	9	normal	2	Semi-Urban	2	Secondary	5	Student	no
2	overweightnonhypertension	earlyterm	38	C/S	active	31	1.63	79	29.7	37.37	89	90	high	0.99	37	2	100	50	50	F	normal	3	normal	47	normal	33	9	normal	1	Urban	1	Tertiary	2	Trading	no
2	overweightnonhypertension	fullterm	40	SVD	early	23	1.74	87	28.7	35.48	87	90	high	0.97	40	2	120	80	40	F	normal	3.5	normal	48	normal	35	9	normal	1	Urban	1	Tertiary	5	Student	yes
2	overweightnonhypertension	fullterm	40	C/S	active	30	1.61	65	25.2	31.74	90	91	high	0.99	40	2	100	60	40	M	normal	3.8	normal	50	normal	40	8	normal	1	Urban	1	Tertiary	1	Civil servant	no
2	overweightnonhypertension	earlyterm	37	SVD	early	24	1.67	82	29.4	35.4	93	94	high	0.99	37	1	110	60	50	M	normal	2.8	normal	48	normal	33	9	normal	1	Urban	1	Tertiary	3	Farming	no
2	overweightnonhypertension	fullterm	40	SVD	active	33	1.74	87	28.7	36.63	94	97	high	0.97	38	2	110	70	40	M	normal	3.4	normal	47	normal	36	9	normal	1	Urban	1	Tertiary	2	Trading	no
2	overweightnonhypertension	fullterm	40	SVD	early	27	1.67	78	28	34.41	92	98	high	0.94	40	1	100	50	50	M	normal	3.2	normal	50	normal	35	9	normal	2	Semi-Urban	1	Tertiary	2	Trading	no
2	overweightnonhypertension	fullterm	39	SVD	active	30	1.58	67	26.8	34.66	91	100	high	0.91	37	1	110	70	40	F	normal	2.8	abnormal	32	normal	32	9	normal	1	Urban	1	Tertiary	1	Civil servant	no
2	overweightnonhypertension	earlyterm	38	C/S	active	35	1.74	88	29.1	37.6	90	96	high	0.94	37	0	100	50	50	M	normal	3.2	normal	49	normal	34	9	normal	1	Urban	1	Tertiary	3	Farming	no
2	overweightnonhypertension	earlyterm	38	SVD	active	32	1.69	84	29.4	37.24	94	97	high	0.97	36	2	100	70	30	F	normal	3	normal	49	normal	35	9	normal	1	Urban	1	Tertiary	1	Civil servant	no
2	overweightnonhypertension	earlyterm	37	SVD	early	25	1.63	71	26.7	32.39	95	98	high	0.97	36	0	110	70	40	M	normal	2.6	normal	49	normal	33	9	normal	1	Urban	1	Tertiary	5	Student	no
2	overweightnonhypertension	fullterm	40	C/S	active	33	1.63	70	26.3	33.75	96	101	high	0.95	37	1	120	80	40	M	normal	3	normal	51	normal	36	8	normal	3	Rural	3	Primary	2	Trading	no
2	overweightnonhypertension	fullterm	40	C/S	early	23	1.77	79	25.2	30.13	97	99	high	0.98	38	0	130	80	50	F	normal	3.9	normal	52	normal	35	9	normal	1	Urban	1	Tertiary	1	Civil servant	no
2	overweightnonhypertension	lateterm	41	C/S	late	38	1.78	69	25.6	34.06	98	100	high	0.98	32	0	120	70	50	M	normal	3.4	normal	50	normal	35	9	normal	1	Urban	2	Secondary	2	Trading	yes
2	overweightnonhypertension	fullterm	40	C/S	early	26	1.54	67	28.3	34.5	99	102	high	0.96	37	1	120	70	50	M	normal	3.3	normal	49	normal	34	8	normal	3	Rural	2	Secondary	4	Labour	no
2	overweightnonhypertension	fullterm	39	SVD	active	33	1.69	74	25.9	33.3	90	94	high	0.96	37	0	100	60	40	F	normal	3.3	normal	51	normal	36	5	abnormal	1	Urban	1	Tertiary	3	Farming	no
2	overweightnonhypertension	fullterm	40	C/S	early	24	1.73	76	25.4	30.6	89	95	high	0.94	36	0	100	50	50	M	normal	3.3	normal	51	normal	37	9	normal	1	Urban	1	Tertiary	1	Civil servant	no
2	overweightnonhypertension	earlyterm	38	SVD	active	31	1.62	74	28.2	35.6	87	90	high	0.97	38	1	120	70	50	F	normal	3.3	normal	51	normal	36	9	normal	1	Urban	1	Tertiary	1	Civil servant	no
2	overweightnonhypertension	fullterm	40	C/S	early	23	1.77	79	25.2	30.5	90	93	high	0.97	36	0	110	66	44	F	normal	3.9	normal	52	normal	35	9	normal	1	Urban	2	Secondary	5	Student	no
2	overweightnonhypertension	preterm	36	SVD	late	38	1.6	68	26.6	35.3	91	94	high	0.97	40	3	114	59	55	F	normal	2.9	abnormal	46	normal	34	9	normal	1	Urban	1	Tertiary	1	Civil servant	no
2	overweightnonhypertension	preterm	36	C/S	late	46	1.62	78	29.7	40.8	92	95	high	0.97	32	2	100	60	40	M	normal	3.6	normal	51	normal	36	9	normal	1	Urban	1	Tertiary	1	Civil servant	no
2	overweightnonhypertension	earlyterm	37	C/S	active	34	1.6	67	26.2	33.9	93	96	high	0.97	36	0	114	75	39	F	normal	3.1	normal	50	normal	35	4	abnormal	2	Semi-Urban	1	Tertiary	2	Trading	no
2	overweightnonhypertension	fullterm	40	C/S	early	25	1.61	72	27.8	33.7	94	96	high	0.98	37	1	128	57	71	M	normal	2.5	normal	50	normal	40	5	abnormal	3	Rural	3	Primary	3	Farming	no
2	overweightnonhypertension	fullterm	40	SVD	active	32	1.65	69	25.3	32.32	94	97	high	0.97	36	1	120	80	40	M	normal	2.5	normal	47	normal	33	9	normal	2	Semi-Urban	3	Primary	2	Trading	yes

## Sheet: Sheet2
stateofhealthcoded	stateofhealth	ges Agecla	GEST. AGE(weeks)	MODE OF DEL.	agecla	AGE (years)	HEIGHT (m)	WEIGHT(kg)	BMI(kg/m2)	%BODY FAT	WAIST CIRCUM(cm)	HIP CIRCUM(cm)	WHRcla	WHR	HEIGHT OF FUNDUS(cm)	PARITY	SBP	DBP	PULSE PRESSURE	SEX OF BABY	Weightcoded	WEIGHT(Kg)	lengthcoded	LENGTH (cm)	Hccoded	HC (cm)	APGAR SCORE	apgar score	residentcoded	RESIDENCE	Educationcoded	EDUCATIONAL STATUS	occupationcoded	OCCUPATION	alcoholic intake
1	1	preterm	31	C/S	early	23	1.65	70	25.7	30.73	90	93	high	0.97	30	0	190	100	90	F	low	1.6	abnormal	42	microcephaly	32	4	abnormal	3	Rural	3	primary	3	Farming	no
1	1	fulltime	40	C/S	early	23	1.7	82	28.4	33.97	89	94	high	0.95	45	0	180	130	50	M	normal	2.5	normal	49	normal	36	7	normal	3	Rural	2	Secondary	3	Farming	no
1	1	earlyterm	38	SVD	active	33	1.72	87	29.4	37.47	93	95	high	0.98	37	1	160	80	80	M	normal	3.5	normal	50	normal	36	9	normal	1	Urban	1	Tertiary	1	Civil Servant	no
1	1	fulltime	40	C/S	early	20	1.53	60	25.6	29.69	91	97	high	0.94	35	0	150	85	65	M	low	2.2	normal	48	normal	36	3	abnormal	1	Urban	3	Primary	2	Trading	no
1	1	fullttime	40	SVD	early	25	1.69	83	29.1	35.37	90	94	high	0.96	36	0	153	91	62	M	normal	3.5	normal	50	normal	36	2	abnormal	3	Rural	3	Primary	4	Labour	yes
1	1	earlyterm	38	C/S	active	35	1.59	73	28.9	37.33	94	95	high	0.99	40	1	140	100	40	F	normal	3.6	normal	51	normal	36	9	normal	1	Urban	1	Tertiary	1	Civil Servant	no
1	1	fulltime	40	C/S	late	38	1.63	67	25.2	33.58	95	99	high	0.96	40	5	180	100	80	F	normal	2.8	normal	47	microcephaly	32	9	normal	3	Rural	3	Primary	3	Trading	no
1	1	fulltime	40	SVD	early	23	1.69	73	25.6	30.61	97	99	high	0.98	36	0	150	90	40	M	normal	3	normal	49	normal	34	8	normal	1	Urban	2	Secondary	5	Student	no
1	1	fulltime	40	SVD	active	35	1.78	90	28.4	37.09	96	100	high	0.96	38	7	220	120	100	F	normal	2.7	normal	48	normal	34	9	normal	2	Semi-Urban	1	Tertiary	1	Civil Servant	no
1	1	fulltime	38	SVD	active	35	1.76	80	25.7	33.49	87	91	high	0.96	37	1	90	60	30	F	normal	3.2	normal	49	normal	35	9	normal	1	Urban	1	Tertiary	1	Civil servant	yes
1	1	fulltime	38	SVD	late	36	1.63	78	29.4	38.16	88	90	high	0.98	38	0	90	60	30	M	normal	3.6	normal	53	normal	33	7	normal	1	Urban	1	Tertiary	1	Civil servant	no
1	1	lateterm	41	C/S	early	28	1.63	68	25.6	1.76	98	99	high	0.99	38	0	130	80	50	F	normal	3	normal	50	normal	40	4	abnormal	3	Rural	2	Secondary	2	Trading	no
1	1	fullterm	40	C/S	early	25	1.74	89	29.4	35.63	90	95	high	0.95	37	1	110	70	40	M	normal	3.5	normal	47	normal	34	8	normal	1	Urban	2	Secondary	5	Student	no
1	1	fullterm	40	SVD	early	26	1.58	68	27.2	33.22	95	99	high	0.96	36	0	110	70	40	F	normal	3.1	abnormal	45	microcephaly	31	9	normal	1	Urban	1	Tertiary	1	Civil servant	yes
1	1	earlyterm	38	SVD	early	26	1.62	73	27.8	33.94	89	97	high	0.92	38	0	100	60	40	M	normal	3.3	normal	49	normal	37	7	normal	1	Urban	2	Secondary	2	Trading	no
1	1	earlyterm	38	C/S	active	32	1.6	72	26.1	33.28	87	90	high	0.97	38	3	100	60	40	M	normal	3.5	normal	49	normal	35	8	normal	1	Urban	1	Tertiary	1	Civil servant	no
1	1	fullterm	39	C/S	active	31	1.63	74	27.9	35.21	88	92	high	0.96	39	2	100	70	30	F	normal	3.3	normal	47	normal	36	8	normal	1	Urban	2	Secondary	2	Trading	no
1	1	fullterm	39	SVD	active	34	1.55	63	26.2	33.86	89	94	high	0.95	38	2	90	60	30	F	normal	3.5	normal	51	normal	36	9	normal	1	Urban	1	Tertiary	2	Trading	no
1	1	earlyterm	38	C/S	late	39	1.6	69	27	35.97	85	90	high	0.94	38	0	110	80	30	F	normal	3.1	abnormal	46	normal	36	9	normal	1	Urban	1	Tertiary	3	Farming	no
1	1	postterm	42	C/S	early	26	1.67	79	28.3	34.54	86	96	high	0.9	40	1	110	70	40	M	normal	3.1	normal	49	normal	36	9	normal	1	Urban	1	Tertiary	1	Civil servant	no
1	1	fullterm	39	SVD	active	32	1.66	72	26.1	33.28	90	95	high	0.95	36	1	90	50	40	M	normal	2.7	abnormal	45	normal	34	8	normal	1	Urban	1	Tertiary	2	Trading	no
1	1	fullterm	39	SVD	active	35	1.58	65	26	33.85	88	92	high	0.96	35	3	90	60	30	F	normal	3.3	normal	47	normal	33	9	normal	1	Urban	1	Tertiary	2	Trading	no
1	1	fullterm	39	SVD	early	27	1.6	72	28.1	34.53	85	90	high	0.94	38	2	120	80	40	M	normal	2.9	normal	48	normal	34	9	normal	1	Urban	1	Tertiary	3	Farming	no
1	1	earlyterm	38	C/S	late	38	1.6	72	28.1	35.45	87	94	high	0.93	39	3	130	80	50	M	normal	3.3	normal	48	normal	34	3	abnormal	1	Urban	1	Tertiary	3	Farming	no
2	1	earlyterm	38	SVD	late	35	1.69	77	26.96	35.05	85	87	high	0.98	34	0	90	60	30	M	normal	2.9	normal	47	microcephaly	31	9	normal	1	Urban	1	Tertiary	3	Farming	no
2	1	fullterm	39	SVD	early	21	1.8	86	26.5	31.23	84	88	high	0.95	37	0	110	60	50	F	normal	2.9	abnormal	46	normal	33	9	normal	2	Semi-Urban	2	Secondary	5	Student	no
2	1	earlyterm	38	C/S	active	31	1.63	79	29.7	37.37	89	90	high	0.99	37	2	100	50	50	F	normal	3	normal	47	normal	33	9	normal	1	Urban	1	Tertiary	2	Trading	no
2	1	fullterm	40	SVD	early	23	1.74	87	28.7	35.48	87	90	high	0.97	40	2	120	80	40	F	normal	3.5	normal	48	normal	35	9	normal	1	Urban	1	Tertiary	5	Student	yes
2	1	fullterm	40	C/S	active	30	1.61	65	25.2	31.74	90	91	high	0.99	40	2	100	60	40	M	normal	3.8	normal	50	normal	40	8	normal	1	Urban	1	Tertiary	1	Civil servant	no
2	1	earlyterm	37	SVD	early	24	1.67	82	29.4	35.4	93	94	high	0.99	37	1	110	60	50	M	normal	2.8	normal	48	normal	33	9	normal	1	Urban	1	Tertiary	3	Farming	no
2	1	fullterm	40	SVD	active	33	1.74	87	28.7	36.63	94	97	high	0.97	38	2	110	70	40	M	normal	3.4	normal	47	normal	36	9	normal	1	Urban	1	Tertiary	2	Trading	no
2	1	fullterm	40	SVD	early	27	1.67	78	28	34.41	92	98	high	0.94	40	1	100	50	50	M	normal	3.2	normal	50	normal	35	9	normal	2	Semi-Urban	1	Tertiary	2	Trading	no
2	1	fullterm	39	SVD	active	30	1.58	67	26.8	34.66	91	100	high	0.91	37	1	110	70	40	F	normal	2.8	abnormal	32	normal	32	9	normal	1	Urban	1	Tertiary	1	Civil servant	no
2	1	earlyterm	38	C/S	active	35	1.74	88	29.1	37.6	90	96	high	0.94	37	0	100	50	50	M	normal	3.2	normal	49	normal	34	9	normal	1	Urban	1	Tertiary	3	Farming	no
2	1	earlyterm	38	SVD	active	32	1.69	84	29.4	37.24	94	97	high	0.97	36	2	100	70	30	F	normal	3	normal	49	normal	35	9	normal	1	Urban	1	Tertiary	1	Civil servant	no
2	1	earlyterm	37	SVD	early	25	1.63	71	26.7	32.39	95	98	high	0.97	36	0	110	70	40	M	normal	2.6	normal	49	normal	33	9	normal	1	Urban	1	Tertiary	5	Student	no
2	1	fullterm	40	C/S	active	33	1.63	70	26.3	33.75	96	101	high	0.95	37	1	120	80	40	M	normal	3	normal	51	normal	36	8	normal	3	Rural	3	Primary	2	Trading	no
2	1	fullterm	40	C/S	early	23	1.77	79	25.2	30.13	97	99	high	0.98	38	0	130	80	50	F	normal	3.9	normal	52	normal	35	9	normal	1	Urban	1	Tertiary	1	Civil servant	no
2	1	lateterm	41	C/S	late	38	1.78	69	25.6	34.06	98	100	high	0.98	32	0	120	70	50	M	normal	3.4	normal	50	normal	35	9	normal	1	Urban	2	Secondary	2	Trading	yes
2	1	fullterm	40	C/S	early	26	1.54	67	28.3	34.5	99	102	high	0.96	37	1	120	70	50	M	normal	3.3	normal	49	normal	34	8	normal	3	Rural	2	Secondary	4	Labour	no
2	1	fullterm	39	SVD	active	33	1.69	74	25.9	33.3	90	94	high	0.96	37	0	100	60	40	F	normal	3.3	normal	51	normal	36	5	abnormal	1	Urban	1	Tertiary	3	Farming	no
2	1	fullterm	40	C/S	early	24	1.73	76	25.4	30.6	89	95	high	0.94	36	0	100	50	50	M	normal	3.3	normal	51	normal	37	9	normal	1	Urban	1	Tertiary	1	Civil servant	no
2	1	earlyterm	38	SVD	active	31	1.62	74	28.2	35.6	87	90	high	0.97	38	1	120	70	50	F	normal	3.3	normal	51	normal	36	9	normal	1	Urban	1	Tertiary	1	Civil servant	no
2	1	fullterm	40	C/S	early	23	1.77	79	25.2	30.5	90	93	high	0.97	36	0	110	66	44	F	normal	3.9	normal	52	normal	35	9	normal	1	Urban	2	Secondary	5	Student	no
2	1	preterm	36	SVD	late	38	1.6	68	26.6	35.3	91	94	high	0.97	40	3	114	59	55	F	normal	2.9	abnormal	46	normal	34	9	normal	1	Urban	1	Tertiary	1	Civil servant	no
2	1	preterm	36	C/S	late	46	1.62	78	29.7	40.8	92	95	high	0.97	32	2	100	60	40	M	normal	3.6	normal	51	normal	36	9	normal	1	Urban	1	Tertiary	1	Civil servant	no
2	1	earlyterm	37	C/S	active	34	1.6	67	26.2	33.9	93	96	high	0.97	36	0	114	75	39	F	normal	3.1	normal	50	normal	35	4	abnormal	2	Semi-Urban	1	Tertiary	2	Trading	no
2	1	fullterm	40	C/S	early	25	1.61	72	27.8	33.7	94	96	high	0.98	37	1	128	57	71	M	normal	2.5	normal	50	normal	40	5	abnormal	3	Rural	3	Primary	3	Farming	no
1	2	fulltime	39	SVD	active	34	1.59	77	30.5	32.02	88	90	high	0.97	36	3	160	110	50	male	normal	3	normal	49	normal	33	8	normal	2	Semi-Urban	1	Tertiary	1	Civil Servant	no
1	2	fulltime	40	SVD	early	27	1.69	110	38.5	47.01	92	98	high	0.94	36	1	150	90	60	male	normal	3.4	normal	54	normal	34	8	normal	1	Urban	1	Tertiary	2	Trading	no
1	2	early time	38	C/S	active	33	1.64	98	36.4	45.87	94	100	high	0.94	39	1	150	90	60	female	normal	2.6	abnrmal	43	normal	34	10	normal	1	Urban	1	Tertiary	1	Civil Servant	no
1	2	fulltime	40	SVD	active	34	1.59	87	34.4	43.7	99	101	high	0.98	38	1	140	90	50	female	low	2.45	normal	50	normal	34	8	normal	1	Urban	1	Tertiary	1	Civil Servant	no
1	2	fulltime	40	SVD	early	23	1.66	88	31.9	38.17	87	89	high	0.98	36	0	150	90	60	female	normal	2.9	normal	46	normal	35	8	normal	1	Urban	1	Tertiary	1	Civil Servant	no
1	2	early time	37	SVD	active	34	1.63	91	34.3	43.58	90	99	high	0.9	38	4	150	100	50	female	normal	2.8	normal	49	normal	33	8	normal	2	Semi-Urban	1	Tertiary	2	Trading	no
1	2	late term	41	SVD	early	28	1.53	77	32.9	40.52	91	96	high	0.95	35	3	150	100	50	male	low	2.2	normal	47	microcephaly	31	7	normal	1	Urban	2	Secondary	2	Farming	no
1	2	early time	37	SVD	early	24	1.68	113	40	48.12	89	95	high	0.94	36	0	170	110	60	male	normal	3.2	normal	49	normal	33	9	normal	3	Rural	1	Tertiary	1	Civil Servant	no
1	2	early time	37	C/S	early	29	1.75	98	32	39.67	88	94	high	0.94	36	1	167	100	67	female	normal	3	normal	47	normal	35	9	normal	1	Urban	1	Tertiary	2	Trading	no
1	2	fulltime	39	C/S	early	26	1.75	106	34.6	42.1	90	93	high	0.97	39	0	160	100	60	male	normal	2.6	abnrmal	45	normal	34	7	normal	1	Urban	1	Tertiary	3	Farming	no
1	2	fulltime	40	SVD	active	31	1.71	116	39.7	49.37	87	92	high	0.95	36	4	190	150	40	male	normal	3.2	normal	48	normal	37	8	normal	1	Urban	1	Tertiary	1	Civil Servant	no
1	2	early time	38	C/S	late	35	1.78	110	34.7	44.29	86	91	high	0.95	40	1	150	100	50	male	macrosomia	4.7	normal	47	normal	36	2	abnormal	1	Urban	1	Tertiary	2	Trading	no
1	2	fulltime	39	C/S	early	28	1.64	96	35.7	43.88	85	88	high	0.97	37	0	160	100	60	male	normal	2.8	abnrmal	45	normal	36	4	abnormal	1	Urban	2	Secondary	4	Labour	no
1	2	fulltime	40	C/S	active	30	1.63	85	32	39.9	93	102	high	0.91	36	4	150	100	50	male	normal	3.85	normal	53	normal	40	10	normal	3	Rural	3	Primary	2	Trading	no
1	2	fulltime	39	SVD	late	36	1.7	93	32.2	41.52	94	103	high	0.91	43	3	168	77	91	male	normal	3.4	normal	50	normal	34	9	normal	1	Urban	1	Tertiary	1	Civil Servant	no
1	2	early time	38	C/S	active	31	1.59	91	36	44.93	99	100	high	0.99	34	1	140	70	70	female	normal	3	normal	52	normal	34	9	normal	1	Urban	1	Tertiary	2	Trading	no
1	2	fulltime	40	C/S	early	24	1.63	85	32	38.5	92	104	high	0.88	38	0	170	100	70	male	normal	3.2	normal	51	normal	36	9	normal	1	Urban	2	Secondary	2	Trading	no
1	2	fulltime	39	C/S	late	35	1.72	123	41.6	52.57	94	105	high	0.9	44	1	140	90	50	female	macrosomia	4.1	normal	53	normal	37	10	normal	1	Urban	1	Tertiary	1	Civil Servant	no
1	2	fulltime	40	C/S	early	28	1.6	92	35.9	44.12	96	106	high	0.91	42	0	150	70	80	female	normal	3.8	normal	52	normal	34	7	normal	1	Urban	1	Tertiary	1	Civil Servant	no
1	2	fulltime	40	SVD	early	29	1.62	90	34.3	42.43	93	107	high	0.87	38	3	140	90	50	male	normal	3.2	normal	50	normal	36	2	abnormal	1	Urban	3	Primary	2	Trading	no
1	2	late term	41	C/S	active	31	1.76	99	32	40.13	90	108	moderate	0.83	39	0	170	110	60	female	macrosomia	4.5	normal	54	normal	34	9	normal	1	Urban	1	Tertiary	2	Trading	no
2	2	late term	41	SVD	early	26	1.67	86	30.8	37.54	95	109	high	0.87	36	0	100	70	30	female	normal	3.2	normal	48	normal	33	9	normal	1	Urban	1	Tertiary	1	Civil Servant	no
2	2	preterm	31	SVD	active	33	1.62	94	35.8	37.54	93	99	high	0.93	32	3	110	50	60	male	low	2.25	normal	44	microcephaly	30	9	normal	1	Urban	1	Tertiary	2	Trading	no
2	2	early time	38	SVD	active	31	1.59	95	37.6	46.85	83	90	high	0.92	38	3	90	60	30	female	normal	3.2	normal	49	normal	34	9	normal	1	Urban	1	Tertiary	1	Civil Servant	no
2	2	fulltime	40	SVD	early	27	1.64	84	31.2	38.25	88	98	high	0.9	40	0	100	80	20	male	macrosomia	4.2	normal	52	normal	35	7	normal	1	Urban	2	Secondary	1	Civil Servant	no
2	2	fulltime	40	SVD	late	37	1.63	94	35.4	44.21	93	97	high	0.96	39	1	100	60	40	male	normal	3.4	normal	50	normal	34	9	normal	1	Urban	1	Tertiary	2	Trading	no
2	2	early time	38	C/S	active	33	1.68	98	34.7	43.83	92	97	high	0.95	40	1	110	70	40	female	normal	3.2	normal	48	normal	34	9	normal	1	Urban	2	Secondary	2	Trading	no
2	2	preterm	36	C/S	early	28	1.7	90	31.1	38.36	89	90	high	0.98	36	2	110	60	50	male	normal	2.5	abnrmal	46	normal	35	8	normal	1	Urban	2	Secondary	2	Trading	no
2	2	fulltime	40	C/S	active	31	1.63	85	32	40.13	92	96	high	0.96	39	0	110	70	40	female	normal	3	normal	52	normal	36	8	normal	1	Urban	1	Tertiary	1	Civil Servant	no
2	2	fulltime	40	SVD	active	31	1.65	102	37.5	46.73	91	95	high	0.96	38	2	120	70	50	male	normal	3.2	abnrmal	46	normal	33	9	normal	1	Urban	1	Tertiary	1	Civil Servant	no
2	2	early time	37	C/S	early	28	1.71	98	33.5	41.24	90	94	high	0.96	45	0	120	80	40	male	normal	2.5	abnrmal	44	normal	34	8	normal	1	Urban	1	Tertiary	2	Trading	no
2	2	fulltime	39	SVD	active	32	1.7	110	38.1	46.76	86	93	high	0.92	39	1	110	70	40	male	normal	3.85	normal	53	normal	37	9	normal	1	Urban	1	Tertiary	1	Civil Servant	no
2	2	fulltime	39	C/S	early	25	1.68	93	32.95	39.89	83	92	high	0.9	39	0	100	60	40	male	normal	3.2	normal	51	normal	36	9	normal	1	Urban	1	Tertiary	2	Trading	no
2	2	fulltime	39	C/S	active	34	1.66	93	33.7	42.86	85	91	high	0.93	40	3	100	60	40	male	normal	3.8	normal	50	normal	36	10	normal	1	Urban	1	Tertiary	1	Civil Servant	no
2	2	early time	38	C/S	active	31	1.84	115	34	42.53	83	86	high	0.97	41	0	120	90	30	male	normal	3.5	normal	50	normal	38	9	normal	1	Urban	1	Tertiary	2	Trading	no
2	2	early time	38	SVD	late	38	1.75	99	32.3	42.1	84	87	high	0.97	49	4	100	60	40	male	macrosomia	4.1	normal	50	normal	37	9	normal	1	Urban	1	Tertiary	1	Civil Servant	no
2	2	fulltime	40	SVD	early	27	1.69	86	33.2	40.65	83	88	high	0.94	37	1	120	70	50	male	normal	4	normal	50	normal	34	9	normal	1	Urban	2	Secondary	5	Student	no
2	2	early time	37	SVD	active	32	1.67	104	37.3	46.72	82	89	high	0.92	41	2	130	80	50	female	normal	2.5	normal	47	normal	34	9	normal	1	Urban	1	Tertiary	1	Civil Servant	no
2	2	preterm	34	SVD	late	38	1.7	105	36.3	46.9	90	101	high	0.89	35	2	110	80	30	female	low	2	normal	47	normal	34	10	normal	3	Rural	2	Secondary	1	Civil Servant	yes
2	2	fulltime	39	SVD	active	32	1.64	82	30.5	38.5	94	102	high	0.92	34	1	90	60	30	male	normal	3.1	normal	48	normal	33	9	normal	1	Urban	1	Tertiary	1	Civil Servant	no
2	2	early time	38	C/S	active	32	1.67	98	35.1	44.77	92	103	high	0.89	41	1	100	70	30	female	normal	3	normal	47	normal	35	8	normal	1	Urban	1	Tertiary	2	Trading	no
2	2	early time	37	C/S	active	32	1.56	76	31.2	39.4	90	104	high	0.87	37	1	110	70	40	male	normal	3	normal	47	normal	37	9	normal	1	Urban	1	Tertiary	2	Trading	no
1	3	preterm	36	C/S	early	31	1.72	62	21	26.88	79	88	high	0.9	38	1	160	110	50	male	low	2.1	short	43	microcephaly	32	5	abnormal	1	Urban	1	Tertiary	2	Trading	no
1	3	fulltime	40	SVD	early	27	1.57	52	21.1	26.13	82	90	high	0.91	26	2	180	120	60	male	low	2.3	short	43	microcephaly	31	9	normal	1	Urban	2	Secondary	2	Trading	no
1	3	preterm	33	C/S	active	33	1.63	65	24.5	31.59	93	110	moderate	0.85	32	2	180	130	50	female	low	1.5	normal	52	normal	33	9	normal	2	Semi-urban	1	Tertiary	1	Civil servant	yes
1	3	fulltime	39	SVD	active	31	1.66	65	23.6	30.05	73	87	moderate	0.84	36	0	140	90	50	female	normal	2.7	normal	50	microcephaly	25	9	abnormal	1	Urban	2	Secondary	2	Trading	no
1	3	fulltime	39	C/S	early	26	1.68	69	24.4	29.86	83	92	high	0.9	39	1	130	100	30	male	normal	3.5	normal	40	microcephaly	30	0	abnormal	3	Rural	2	Secondary	2	Trading	no
1	3	earlyterm	38	C/S	late	38	1.75	72	23.53	31.67	82	90	high	0.91	33	3	170	90	80	male	low	1.9	short	45	microcephaly	26	7	normal	1	Urban	2	Secondary	2	Trading	no
1	3	ealyterm	37	SVD	early	25	1.65	65	23.88	25.87	90	101	high	0.89	34	4	140	105	35	male	low	2.4	short	40	microcephaly	31	8	normal	1	Urban	2	Secondary	2	Trading	no
1	3	preterm	36	SVD	early	26	1.56	56	23.01	27.88	71	88	moderate	0.81	32	3	145	100	45	female	normal	3.1	short	41	microcephaly	32	5	abnormal	1	Urban	2	Secondary	3	Farming	no
1	3	preterm	36	SVD	early	27	1.73	65	21.72	28.9	80	91	high	0.88	30	2	155	110	45	female	low	2.3	short	42	normal	34	6	abnormal	2	Semi-urban	1	Tertiary	3	Farming	yes
1	3	ealyterm	38	C/S	early	28	1.65	70	24.71	25	87	98	high	0.89	25	1	150	90	60	male	normal	2.5	short	45	microcephaly	27	7	normal	3	Rural	1	Tertiary	1	Civil servant	yes
1	3	fulltime	39	C/S	active	32	1.81	58	17.7	26.67	79	89	high	0.89	27	0	160	100	60	male	low	1.9	short	39	microcephaly	28	8	normal	3	Rural	2	Secondary	2	Trading	no
1	3	preterm	35	C/S	active	33	1.66	59	21.41	30.11	89	94	high	0.95	28	3	150	120	30	female	low	2	short	38	microcephaly	29	4	abnormal	3	Rural	2	Secondary	2	Trading	no
1	3	fulltime	40	SVD	active	34	1.55	61	24.39	32.34	79	88	high	0.9	29	5	160	100	60	female	low	2.2	short	37	microcephaly	25	7	normal	1	Urban	1	Tertiary	3	Farming	yes
1	3	preterm	36	C/S	early	26	1.72	60	20.28	29	81	92	high	0.88	30	2	175	120	55	male	normal	2.6	short	40	microcephaly	26	8	normal	1	Urban	2	Secondary	1	Civil servant	no
2	3	fulltime	39	SVD	early	27	1.63	65	24.5	30.21	85	91	high	0.93	37	2	100	50	50	female	normal	3.1	normal	50	normal	34	8	normal	3	Rural	2	Secondary	2	Trading	no
1	3	fulltime	39	SVD	late	42	1.67	65	23.3	32.2	75	82	high	0.91	35	2	100	60	40	male	normal	3.3	normal	51	normal	34	9	normal	3	Rural	2	Secondary	1	Civil Servant	no
1	3	preterm	36	SVD	late	36	1.73	66	22.1	29.4	78	89	high	0.88	34	3	100	60	40	male	normal	3.4	normal	50	normal	36	1	abnormal	1	Urban	2	Secondary	2	Trading	no
1	3	fulltime	40	SVD	early	24	1.66	68	24.7	35.16	81	92	high	0.88	40	2	100	70	30	male	normal	2.9	normal	49	normal	34	9	normal	1	Urban	2	Secondary	2	Trading	yes
2	3	earlyterm	38	C/S	active	31	1.68	70	24.8	31.49	73	84	high	0.87	37	1	100	70	30	female	normal	2.8	short	44	normal	33	9	abnormal	1	Urban	1	Tertiary	1	Civil Servant	no
2	3	lateterm	41	C/S	early	25	1.62	65	24.8	30.11	89	94	high	0.95	35	0	100	60	40	male	normal	3.4	normal	53	normal	36	9	normal	3	Rural	2	Secondary	4	Labour	no
2	3	fulltime	40	SVD	early	25	1.72	62	21	25.55	79	88	high	0.9	38	2	110	80	30	female	normal	3	normal	50	normal	35	9	normal	1	Urban	2	Secondary	5	Student	no
2	3	fulltime	40	C/S	active	31	1.63	66	24.8	31.49	89	97	high	0.92	37	3	133	89	44	female	normal	2.7	normal	49	normal	33	2	abnormal	3	Rural	3	Primary	3	Farming	no
2	3	preterm	33	C/S	early	23	1.58	52	20.8	24.85	82	90	high	0.91	25	0	130	80	50	female	low	1.5	short	39	microcephaly	29	6	abnormal	2	Semi-Urban	2	Secondary	4	Labour	yes
2	3	fulltime	40	C/S	early	20	1.81	78	23.8	26.82	81	90	high	0.9	35	0	120	60	60	female	normal	3.2	short	45	normal	46	9	normal	3	Rural	3	Primary	3	Farming	no
2	3	earlyterm	38	SVD	early	25	1.78	72	22.7	27.59	74	89	moderate	0.83	34	0	110	70	40	female	normal	2.8	normal	50	microcephaly	32	9	normal	2	Semi-Urban	2	Secondary	5	Student	no
2	3	lateterm	41	SVD	early	25	1.68	70	24.8	30.11	78	87	high	0.9	39	0	120	80	40	female	normal	3.3	normal	52	microcephaly	32	9	normal	2	Semi-Urban	2	Secondary	5	Student	yes
2	3	earlyterm	38	SVD	early	29	1.63	62	23.3	29.23	79	88	high	0.9	37	1	110	60	50	female	normal	3.2	normal	48	normal	34	9	normal	1	Urban	1	Tertiary	1	Civil Servant	no
2	3	earlyterm	38	C/S	active	34	1.59	62	24.5	31.36	93	110	high	0.87	38	0	100	60	40	male	normal	3.2	normal	50	normal	36	7	normal	2	Semi-Urban	1	Tertiary	3	Farming	no
2	3	earlyterm	38	SVD	early	27	1.78	69	21.8	26.97	73	87	high	0.84	32	0	120	70	50	male	normal	2.6	normal	46	normal	34	9	normal	1	Urban	1	Tertiary	1	Civil Servant	no
2	3	fulltime	39	SVD	early	23	1.7	72	24.9	29.8	82	90	high	0.91	36	0	110	70	40	male	normal	3.1	normal	49	normal	35	9	normal	1	Urban	1	Tertiary	2	Trading	no
2	3	earlyterm	37	C/S	late	36	1.81	78	23.8	31.44	88	89	high	0.99	36	3	80	50	30	male	normal	3	normal	49	normal	34	9	normal	1	Urban	1	Tertiary	2	Trading	no
2	3	fulltime	40	SVD	early	28	1.7	67	23.2	28.88	71	88	moderate	0.81	37	0	90	50	40	male	normal	3	normal	52	normal	33	8	normal	1	Urban	1	Tertiary	1	Civil Servant	no
2	3	earlyterm	37	SVD	early	23	1.58	56	22.4	12.49	80	91	high	0.88	34	0	110	50	60	female	normal	3	normal	49	microcephaly	32	9	normal	1	Urban	2	Secondary	2	Trading	no
